# Supplementary material for: A Mutation in Endogenous saRNA miR-23a Influences Granulosa Cells Response to Oxidative Stress
Source: MDPI journal article supplement (doi:10.3390/antiox11061174), 2022-06-15
Supplement: s1 [file s1]

Supplemental Figures

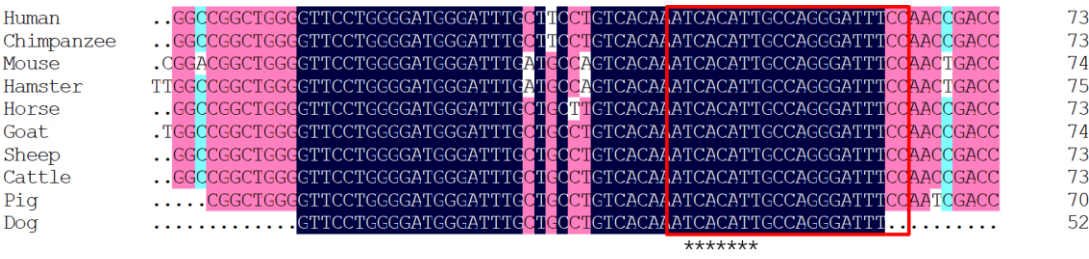

**Figure S1. Multi-sequence alignment of pre-miR-23a in mammal.** The mature sequence is boxed and the asterisk marks the seed sequence. Black parts represent all species with identical sequences, cyan and magenta represent the same sequence in multiple species.

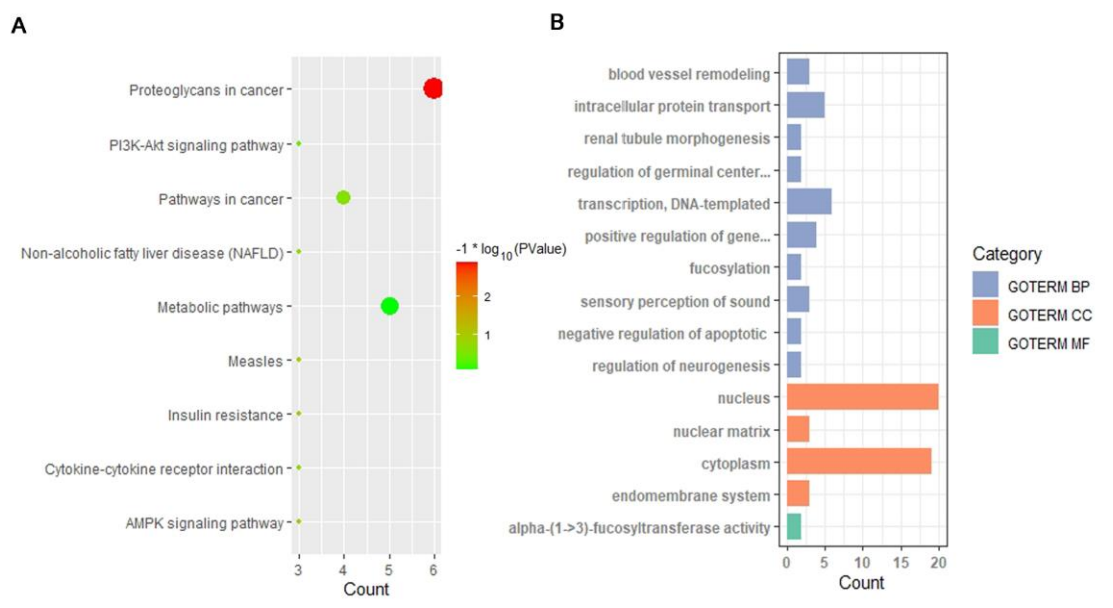

**Figure S2. Functional analysis of miR-23a target genes. (A)** Analysis of KEGG pathway. PValue, Enrichment significance, was calculated by hypergeometric test.  $-1 * \log_{10}(\text{PValue})$  is the ordinate, and the number of enriched genes in each pathway, count, is coordinate. **(B)** GO term analysis. Count is the number of enriched genes in each term. BP means biological process, MF means molecular function, and CC means cellular component.

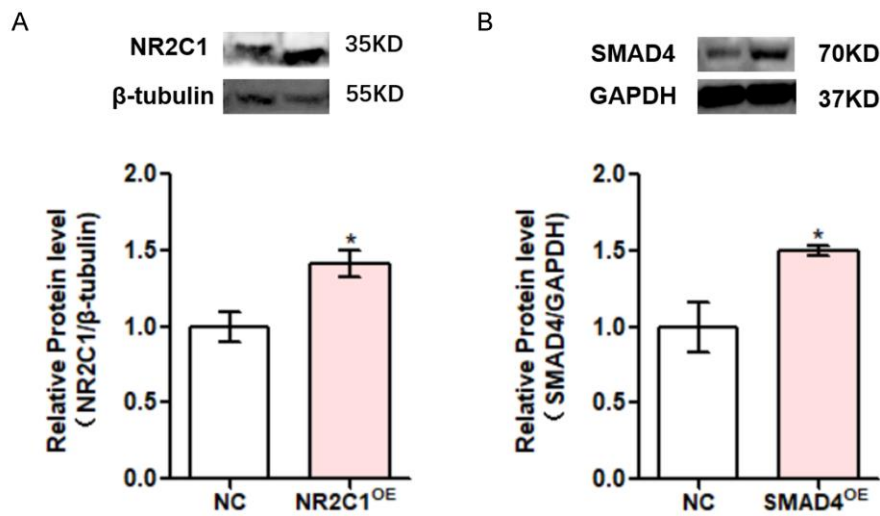

**Figure S3.** pGCs were treated with pcDNA3.1-SMAD4 and pcDNA3.1-NR2C1, western blotting was performed to detect protein levels of SMAD4 and NR2C1. (A-B) β-tubulin and GAPDH are internal reference of NR2C1 (A) and SMAD4 (B), respectively. Data are expressed as mean ± S.E.M., and significance was tested using a t-test. (\*P < 0.05).

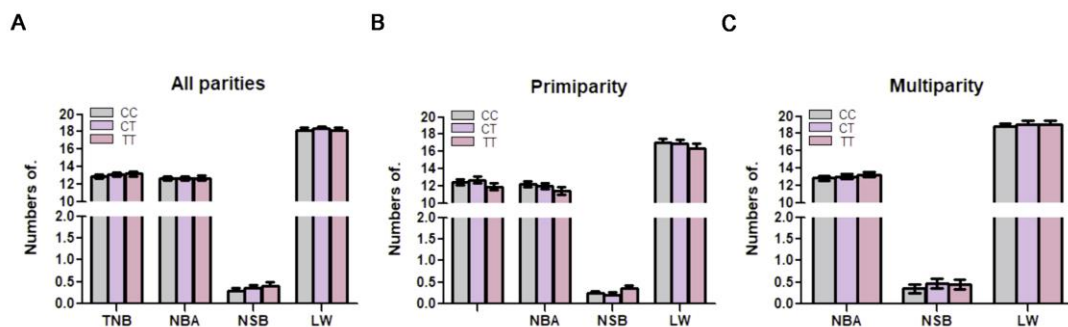

**Figure S4.** Association analysis of SNV g.-398C>T with reproductive traits in Yorkshire sows. (A) All parities. (B) Primiparity. (C) Multiparity.

## Supplemental Tables

**Table S1. Information of oligonucleotides.**

| Oligonucleotides  | Accession number | Oligonucleotide sequence (5' to 3') |
|-------------------|------------------|-------------------------------------|
| mimics NC         | (NR_038489)      | UUGUACUACACAAAAGUACUG               |
| miR-23a mimics    |                  | AUCACAUUGCCAGGGAUUUCC               |
| inhibitor NC      | (NR_038489)      | CAGUACUUUUGUGUAGUACAA               |
| miR-23a inhibitor |                  | GGAAAUCCCUGGCAAUGGAU                |

**Table S2. Information of primers for qRT-PCR.**

| Name      | Accession number | Sequence(5' to 3')                                                | Product size | Annealing temp |
|-----------|------------------|-------------------------------------------------------------------|--------------|----------------|
| miR-23a   | NR_038489        | F: CGGGCATCACATTGCCAGG<br>R: CAGCCACAAAAGAGCACAAAT                | 56           | 60             |
| U6        | EU520423.1       | F: GCTTCGGCAGCACATATACT<br>R: TTCACGAATTTGCGTGTCAT                | 86           | 60             |
| NORHA     | XR_304632.3      | F: GCTGAACCTGGGGAGTGTCTA<br>R: TCTCTGTCCTTGTTGTTCTGC              | 176          | 60             |
| GAPDH     | NM_001206359.1   | F: GGACTCATGACCACGGTCCAT<br>R: TCAGATCCACAACCGACACGT              | 163          | 60             |
| FoxO1     | NM_214014.3      | F: GCAAATCGAGTTACGGAGGC<br>R: AATGTCATTATGGGGAGGAGAGT             | 170          | 60             |
| stem loop | NR_038489        | CCTGTTGTCTCCAGCCACAAAAGAGC<br>ACAATATTTTCAGGAGACAACAGGGG<br>AAATC |              |                |

**Table S3. Information of primers for plasmid construction.**

| Name     | Accession number | Primer sequence (5' to 3')                                                           | Product size (bp) | Annealing temp (°C) |
|----------|------------------|--------------------------------------------------------------------------------------|-------------------|---------------------|
| P189     | NC_010444        | F: <u>CGGGGTACCCCTGGCTTTGGGAGTTCCT</u><br>R: <u>CCGCTCGAGCTGCCATCCTTTGAGGTCTTG</u>   | 189               | 56                  |
| P558     | NC_010444        | F: <u>CGGGGTACCGGGAAACTGAGGCTTAAAGGG</u><br>R: <u>CCGCTCGAGCTGCCATCCTTTGAGGTCTTG</u> | 558               | 58                  |
| p1018    | NC_010444        | F: <u>CGGGGTACCCCGTCCTAAATCCTTACCAG</u><br>R: <u>CCGCTCGAGCTGCCATCCTTTGAGGTCTTG</u>  | 1018              | 58                  |
| p1346    | NC_010444        | F: <u>CGGGGTACCCCTTCCCGTTCTCGTCCC</u><br>R: <u>CCGCTCGAGCTGCCATCCTTTGAGGTCTTG</u>    | 1376              | 58                  |
| pGL3-C/T | NC_010444        | F: <u>CGGGGTACCGCCCTGGTGGTTTCTCCTG</u><br>R: <u>CCGCTCGAGCTCCCTTCCCCACCACT</u>       | 155               | 60                  |

**Table S4. Information of primer for ChIP.**

| Name | Accession number | Sequence(5' to 3')                                 | Product size (bp) | Annealing temp (°C) |
|------|------------------|----------------------------------------------------|-------------------|---------------------|
| MRE  | NC_010449.5      | F: TGCTTCGAGGAGCCAGTCTC<br>R: CAGCAGGAGCAGGAAGAAGC | 170               | 55                  |
| X    | NC_010449.5      | F: CCTTCCTAATCCACCGACTT<br>R: GAGGCACGCTCTGAGATTC  | 144               | 62                  |
| SBE  | NC_010444        | F: GCCCTGGTGGTTTCCTCCT<br>R: TCCCTTCCCCACCACCACT   | 154               | 63                  |

**Table S5. Information of primers for Genotyping.**

| Gene    | Accession number | Primer sequences                                       | Product size (bp) | Annealing temp (°C) |
|---------|------------------|--------------------------------------------------------|-------------------|---------------------|
| miR-23a | NC_010444        | F: AGGGCACCGAGTTTTTCATT<br>R: ATCAACTGTGTTTCAGCTCAGTAG | 1173              | 58                  |

**Table S6. The potential targets of miR-23a.**

| <b>Targets</b> | <b>Full name</b>                                       |
|----------------|--------------------------------------------------------|
| ALAS1          | 5'-aminolevulinate synthase 1                          |
| ANKRD50        | ankyrin repeat domain 50                               |
| ANXA2          | annexin A2                                             |
| ATP11B         | ATPase phospholipid transporting 11B (putative)        |
| ATXN1          | ataxin 1                                               |
| ATXN7L3B       | ataxin 7 like 3B                                       |
| BICD2          | BICD cargo adaptor 2                                   |
| BLCAP          | BLCAP, apoptosis inducing factor                       |
| BTAf1          | B-TFIID TATA-box binding protein associated factor 1   |
| BTBD7          | BTB domain containing 7                                |
| C2orf69        | chromosome 2 open reading frame 69                     |
| C6orf62        | chromosome 6 open reading frame 62                     |
| CADM3          | cell adhesion molecule 3                               |
| CCDC6          | coiled-coil domain containing 6                        |
| CDK17          | cyclin dependent kinase 17                             |
| CELF1          | CUGBP Elav-like family member 1                        |
| CHD7           | chromodomain helicase DNA binding protein 7            |
| CLCN3          | chloride voltage-gated channel 3                       |
| COL4A1         | collagen type IV alpha 1 chain                         |
| CREBZF         | CREB/ATF bZIP transcription factor                     |
| CUL3           | cullin 3                                               |
| CXCL12         | C-X-C motif chemokine ligand 12                        |
| DCP2           | decapping mRNA 2                                       |
| DHX15          | DEAH-box helicase 15                                   |
| DUSP5          | dual specificity phosphatase 5                         |
| EGLN2          | egl-9 family hypoxia inducible factor 2                |
| EPAS1          | endothelial PAS domain protein 1                       |
| EPS15          | epidermal growth factor receptor pathway substrate 15  |
| ERBB4          | erb-b2 receptor tyrosine kinase 4                      |
| ETNK1          | ethanolamine kinase 1                                  |
| FAM126B        | family with sequence similarity 126 member B           |
| FUT4           | fucosyltransferase 4                                   |
| FUT9           | fucosyltransferase 9                                   |
| HDAC7          | histone deacetylase 7                                  |
| HMGB2          | high mobility group box 2                              |
| HS6ST3         | heparan sulfate 6-O-sulfotransferase 3                 |
| IPO5           | importin 5                                             |
| JARID2         | jumonji and AT-rich interaction domain containing 2    |
| KIAA1109       | KIAA1109                                               |
| LBR            | lamin B receptor                                       |
| LMNB1          | lamin B1                                               |
| LPAR1          | lysophosphatidic acid receptor 1                       |
| LRIG1          | leucine rich repeats and immunoglobulin like domains 1 |
| MAP3K9         | mitogen-activated protein kinase kinase kinase 9       |
| MAPRE1         | microtubule associated protein RP/EB family member 1   |
| MARCKS         | myristoylated alanine rich protein kinase C substrate  |
| MARCKSL1       | MARCKS like 1                                          |
| MCFD2          | multiple coagulation factor deficiency 2               |
| MED13L         | mediator complex subunit 13 like                       |
| MEF2C          | myocyte enhancer factor 2C                             |

|          |                                                                          |
|----------|--------------------------------------------------------------------------|
| MSMO1    | methylsterol monooxygenase 1                                             |
| NAA50    | N(alpha)-acetyltransferase 50, NatE catalytic subunit                    |
| NAP1L5   | nucleosome assembly protein 1 like 5                                     |
| NCOA6    | nuclear receptor coactivator 6                                           |
| NUAK1    | NUAK family kinase 1                                                     |
| ORMDL1   | ORMDL sphingolipid biosynthesis regulator 1                              |
| OSBPL8   | oxysterol binding protein like 8                                         |
| PARD6B   | par-6 family cell polarity regulator beta                                |
| PBRM1    | polybromo 1                                                              |
| PDE7A    | phosphodiesterase 7A                                                     |
| PDPK1    | 3-phosphoinositide dependent protein kinase 1                            |
| PGRMC2   | progesterone receptor membrane component 2                               |
| PHYHIPL  | phytanoyl-CoA 2-hydroxylase interacting protein like                     |
| PIK3C2A  | phosphatidylinositol-4-phosphate 3-kinase catalytic subunit type 2 alpha |
| PIK3R3   | phosphoinositide-3-kinase regulatory subunit 3                           |
| PIP4K2B  | phosphatidylinositol-5-phosphate 4-kinase type 2 beta                    |
| PKIA     | cAMP-dependent protein kinase inhibitor alpha                            |
| PKP4     | plakophilin 4                                                            |
| PNMA2    | PNMA family member 2                                                     |
| PNRC1    | proline rich nuclear receptor coactivator 1                              |
| POM121C  | POM121 transmembrane nucleoporin C                                       |
| PPP1R12A | protein phosphatase 1 regulatory subunit 12A                             |
| PSD3     | pleckstrin and Sec7 domain containing 3                                  |
| PTP4A2   | protein tyrosine phosphatase type IVA, member 2                          |
| QKI      | QKI, KH domain containing RNA binding                                    |
| QSER1    | glutamine and serine rich 1                                              |
| RAI14    | retinoic acid induced 14                                                 |
| RCHY1    | ring finger and CHY zinc finger domain containing 1                      |
| REPS2    | RALBP1 associated Eps domain containing 2                                |
| RNF38    | ring finger protein 38                                                   |
| RPRD2    | regulation of nuclear pre-mRNA domain containing 2                       |
| SATB1    | SATB homeobox 1                                                          |
| SEMA6D   | semaphorin 6D                                                            |
| SETD2    | SET domain containing 2, histone lysine methyltransferase                |
| SLC1A1   | solute carrier family 1 member 1                                         |
| SLC25A36 | solute carrier family 25 member 36                                       |
| SMS      | spermine synthase                                                        |
| SNX27    | sorting nexin family member 27                                           |
| SPRY2    | sprouty RTK signaling antagonist 2                                       |
| STK35    | serine/threonine kinase 35                                               |
| STRN     | striatin                                                                 |
| STX12    | syntaxin 12                                                              |
| SYT4     | synaptotagmin 4                                                          |
| TADA1    | transcriptional adaptor 1                                                |
| TAOK1    | TAO kinase 1                                                             |
| TARDBP   | TAR DNA binding protein                                                  |
| TBC1D15  | TBC1 domain family member 15                                             |
| TBC1D9   | TBC1 domain family member 9                                              |
| TBR1     | T-box, brain 1                                                           |
| TCF24    | transcription factor 24                                                  |
| TGFBR2   | transforming growth factor beta receptor 2                               |
| TGFBR3   | transforming growth factor beta receptor 3                               |
| TLK1     | tousled like kinase 1                                                    |
| TNFAIP3  | TNF alpha induced protein 3                                              |

|        |                                                  |
|--------|--------------------------------------------------|
| TNRC6B | trinucleotide repeat containing 6B               |
| USP46  | ubiquitin specific peptidase 46                  |
| VCAN   | versican                                         |
| VCPIP1 | valosin containing protein interacting protein 1 |
| WNK1   | WNK lysine deficient protein kinase 1            |
| ZCCHC2 | zinc finger CCHC-type containing 2               |
| ZNF292 | zinc finger protein 292                          |

---
